# Supplementary material for: Sex and gender-based analysis and diversity metric reporting in acute care trials published in high-impact journals: a systematic review
Source: HighWire-hosted journal article supplement (doi:10.1136/bmjopen-2023-081118), 2024-05-01
Supplement: bmjopen-2023-081118supp002_data_supplement.pdf [file bmjopen-2023-081118supp002_data_supplement.pdf]

### Supplementary Material

- ☐ **Supplementary Figure 1: Pooled prevalence of women/females in ICU versus cardiology trials**
- ☐ **Supplementary Figure 2: Pooled prevalence of women/females across trials in 2014, 2018 and 2020**
- ☐ **Supplementary Figure 3: Pooled prevalence of females/women in trials before versus after SAGER guideline publication**
- ☐ **Supplementary Figure 4: Meta-regression evaluating inclusion of females/women across 2014, 2018 and 2020**
- ☐ **Supplementary Figure 5: Bubble plot of meta-regression evaluating inclusion of females/women across 2014, 2018 and 2020**

**Supplementary Figure 1: Pooled prevalence of females/women in ICU versus cardiology trials**

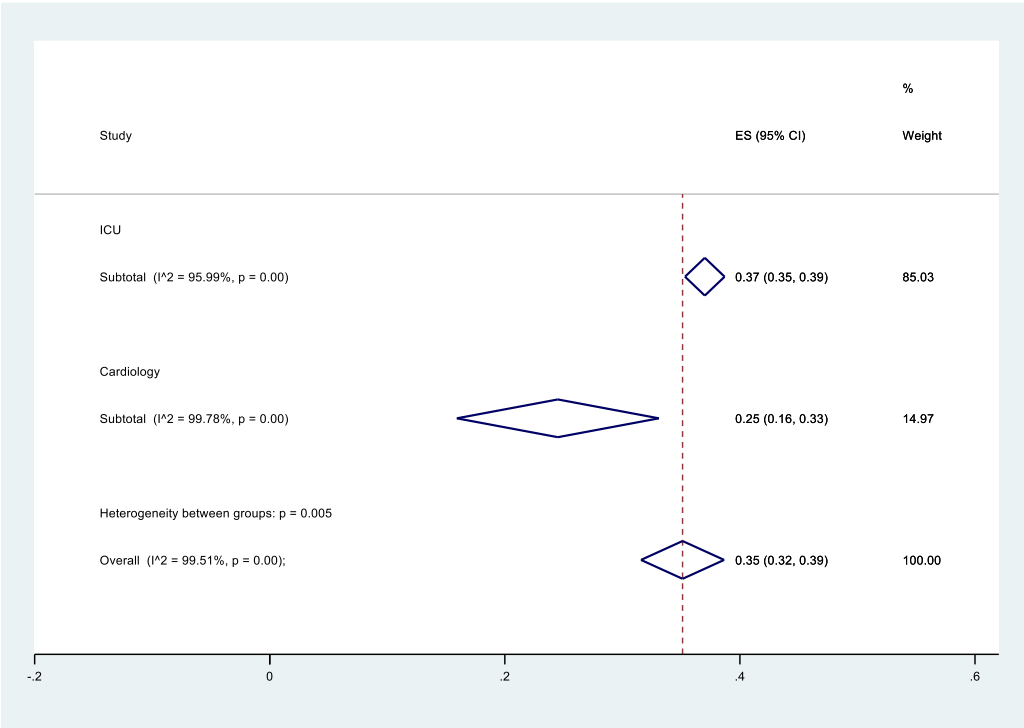

The pooled prevalence of females/women across all trials was 35% (95% CI, 32%, 39%), and significantly higher in ICU trials (37%; 95% CI, 16%, 33%) versus cardiology trials (25%; 95% CI, 16%, 33%)

**Supplementary Figure 2: Pooled prevalence of females/women across trials in 2014, 2018 and 2020**

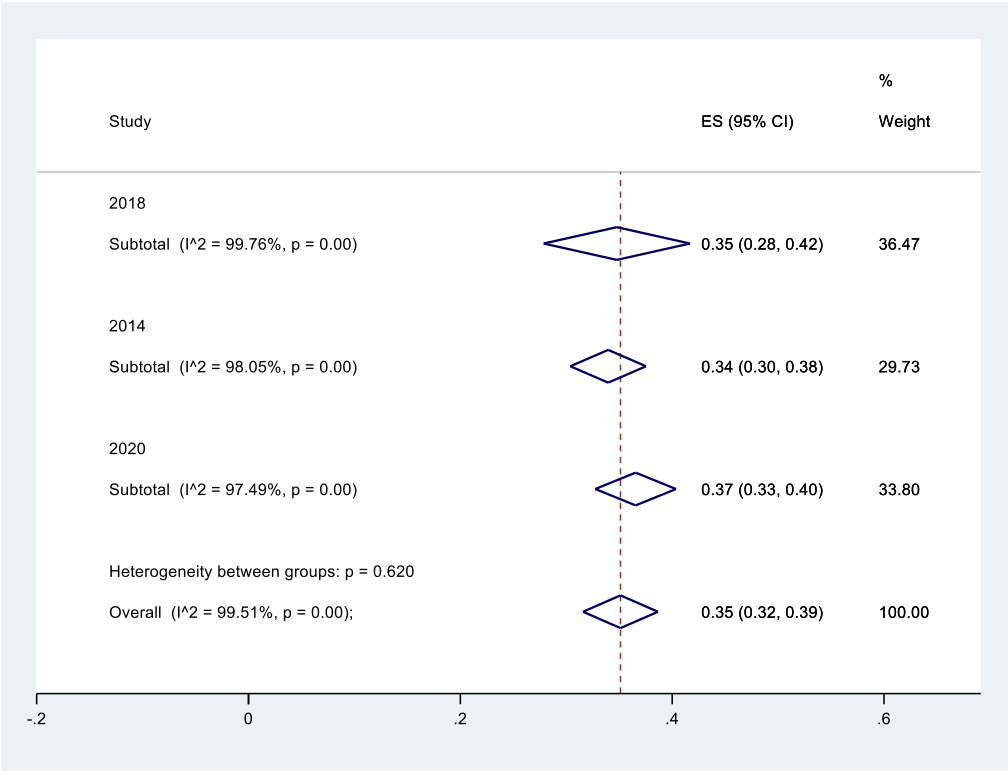

The pooled prevalence of females/women in each identified year was 34% (95% CI, 30%, 38%) in 2014, 35% (95% CI, 28%, 42%) in 2018, and 37% (95% CI, 33%, 40%) in 2020. There was no difference in the pooled prevalence of females/women included across these years ( $p=0.620$ )

**Supplementary Figure 3: Pooled prevalence of females/women in trials before versus after SAGER guideline publication**

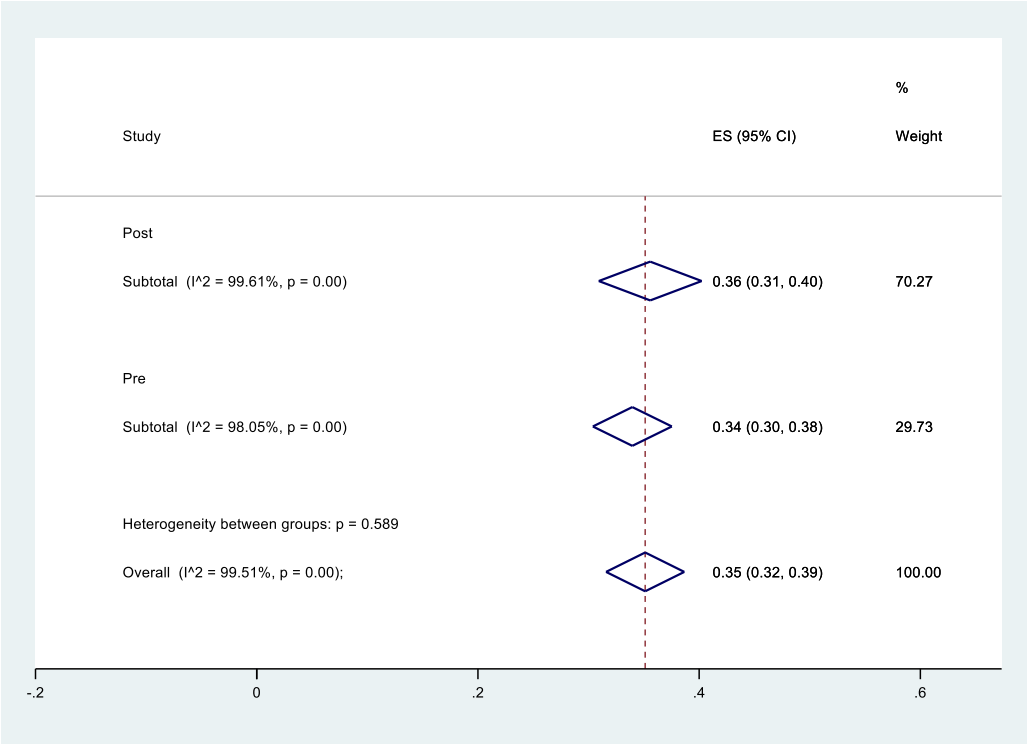

There was no difference in the inclusion of females/women pre-SAGER (2014) [34%; 95% CI, 30%, 38%) and post-SAGER (2018 and 2020) guideline implementation [36%; 95% CI, 31%, 40%] ( $p=0.589$ )

Supplementary Figure 4: Meta-regression evaluating inclusion of females/women across 2014, 2018 and 2020

|                                                                                |             |           |                         |       |                      |
|--------------------------------------------------------------------------------|-------------|-----------|-------------------------|-------|----------------------|
| Effect-size label: Effect size                                                 |             |           |                         |       |                      |
| Effect size: _ES                                                               |             |           |                         |       |                      |
| Std. err.: _seES                                                               |             |           |                         |       |                      |
| Random-effects meta-regression                                                 |             |           | Number of obs = 88      |       |                      |
| Method: DerSimonian-Laird                                                      |             |           | Residual heterogeneity: |       |                      |
|                                                                                |             |           | tau2 = .02787           |       |                      |
|                                                                                |             |           | I2 (%) = 99.49          |       |                      |
|                                                                                |             |           | H2 = 197.90             |       |                      |
|                                                                                |             |           | R-squared (%) = 1.01    |       |                      |
|                                                                                |             |           | Wald chi2(1) = 0.15     |       |                      |
|                                                                                |             |           | Prob > chi2 = 0.6959    |       |                      |
| _meta_es                                                                       | Coefficient | Std. err. | z                       | P> z  | [95% conf. interval] |
| AfterSAGER1                                                                    | .0153522    | .0392807  | 0.39                    | 0.696 | -.0616366 .092341    |
| _cons                                                                          | .3404224    | .0329266  | 10.34                   | 0.000 | .2758875 .4049572    |
| Test of residual homogeneity: Q_res = chi2(86) = 17019.30Prob > Q_res = 0.0000 |             |           |                         |       |                      |

**Supplementary Figure 5: Bubble plot of meta-regression evaluating inclusion of females/women across 2014, 2018 and 2020**

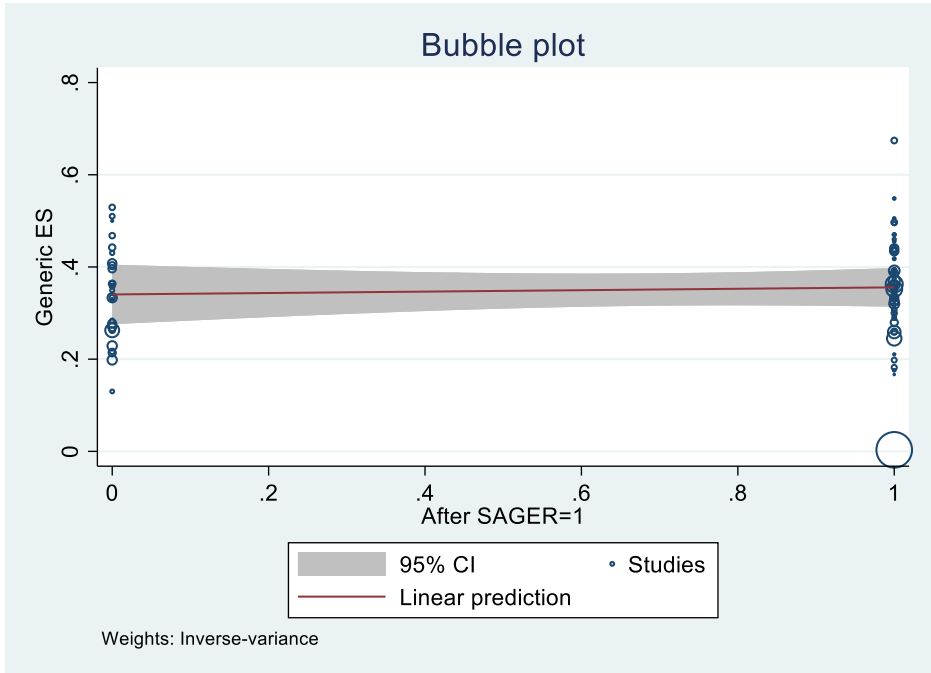

Meta-regression evaluating inclusion of females/women across 2014, 2018 and 2020 revealed an  $R^2 = 1.01\%$  (Supplementary Figure 4), suggesting that 1% of the of the proportion of women enrolled in trials could be explained by whether the trial was published pre- or post-publication of the SAGER guidelines
